# Supplementary material for: Effect of brain-computer interface training based on non-invasive electroencephalography using motor imagery on functional recovery after stroke - a systematic review and meta-analysis
Source: PubMed Central journal article supplement (PMC7584076; doi:10.1186/s12883-020-01960-5), 2020-10-22
Supplement: 12883_2020_1960_MOESM1_ESM.pdf [file 12883_2020_1960_MOESM1_ESM.pdf]

## IEEE (112)

((("Document Title":"brain-computer interface" OR "Document Title":"brain-machine interface" OR "Document Title":"usercomputer interface" OR "Document Title":"human-computer interface" OR "Abstract":"brain-computer interface" OR "Abstract":"brain-machine interface" OR "Abstract":"user-computer interface" OR "Abstract":"human-computer interface") AND ("Document Title":stroke OR "Document Title":CVA OR "Document Title":"post-stroke" OR "Document Title":apoplex\* OR "Abstract":stroke OR "Abstract":CVA OR "Abstract":"post-stroke" OR "Abstract":apoplex\*))

## Embase (174)

#6 #5 AND ([english]/lim OR [german]/lim)

#5 #4 NOT ([animals]/lim NOT [humans]/lim)

#4 #1 AND #2 AND #3

#3 'rehabilitation'/exp OR 'rehabilitation medicine'/exp OR 'daily life activity'/exp OR rehabilitation:ti,ab OR readaption:ti,ab OR readjust\*:ti,ab OR revalidat\*:ti,ab OR recover\*:ti,ab OR 'functional assessment\*':ti,ab OR neurorehabilitation:ti,ab OR 'neuro-rehabilitation':ti,ab OR independen\*:ti,ab OR (((walking OR motor) NEAR/3 function):ti,ab) OR (((functional OR motor) NEAR/3 (recover\* OR impair\*)):ti,ab) OR ((daily NEAR/3 activit\*):ti,ab)

#2 'cerebrovascular accident'/exp OR 'cerebrovascular disease'/exp OR 'brain ischemia'/de OR 'brain hemorrhage'/exp OR 'stroke patient'/exp OR stroke:ti,ab OR cva:ti,ab OR 'post stroke':ti,ab OR 'post-stroke':ti,ab OR apoplex\*:ti,ab OR (((brain OR cerebral OR cerebrovascular OR ischaemic OR ischemic OR intracran\* OR intracerebral OR subarachnoid) NEAR/3 (insult\* OR attack\* OR accident\* OR arrest\* OR injur\* OR insufficien\* OR failure\* OR seizure\* OR infarct\* OR thrombo\* OR emboli\* OR occlus\* OR haemorrhage\* OR hemorrhage\* OR haematoma\* OR hematoma\* OR bleed\*)):ti,ab)

#1 'brain computer interface'/exp OR (((brain OR human OR user) NEAR/1 (computer OR machine)):ti,ab) AND interfac\*:ti,ab)

## Cochrane (87)

#1 (((brain or human or user) near/1 (computer or machine)) and interfac\*):ti,ab,kw (Word variations have been searched)

#2(stroke or CVA or post-stroke or "post-stroke" or apoplex\*) or ((brain or cerebral or cerebrovascular or ischaemic or ischemic or intracran\* or intracerebral or subarachnoid) near/3 (insult\* or attack\* or accident\* or arrest\* or injur\* or insufficien\* or failure\* or seizure\* or infarct\* or thrombo\* or emboli\* or occlus\* or haemorrhage\* or hemorrhage\* or haematoma\* or hematoma\* or bleed\*)):ti,ab,kw (Word variations have been searched)

#3 (rehabilitation or readaption or readjust\* or revalidat\* or recover\* or "functional assessment\*" or neurorehabilitation or "neuro-rehabilitation" or independen\*) or ((walking or motor) near/3 function) or ((functional or motor) near/3 (recover\* or impair\*)) or (daily near/3 activit\*):ti,ab,kw (Word variations have been searched)

#4 #1 and #2 and #3

## Medline (271)

# S1 (MH "Brain-Computer Interfaces") OR TI (((brain OR human OR user) N1 (computer OR machine)) AND interfac\*) OR AB (((brain OR human OR user) N1 (computer OR machine)) AND interfac\*)

# S2 ( (MH "Stroke+") OR (MH "Cerebrovascular Disorders+") OR (MH "Brain Ischemia+") OR (MH "Intracranial Hemorrhages+") ) OR TI ( (stroke OR CVA OR post-stroke OR post stroke OR apoplex\*) OR ((brain OR cerebral OR cerebrovascular OR ischaemic OR ischemic OR intracran\* OR intracerebral OR subarachnoid) N3 (insult\* OR attack\* OR accident\* OR arrest\* OR injur\* OR insufficien\* OR failure\* OR seizure\* OR infarct\* OR thrombo\* OR emboli\* OR occlus\* OR haemorrhage\* OR hemorrhage\* OR haematoma\* OR hematoma\* OR bleed\*)) ) OR AB ( (stroke OR CVA OR post-stroke OR post stroke OR apoplex\*) OR ((brain OR cerebral OR cerebrovascular OR ischaemic OR ischemic OR intracran\* OR intracerebral OR subarachnoid) N3 (insult\* OR attack\* OR accident\* OR arrest\* OR injur\* OR insufficien\* OR failure\* OR seizure\* OR infarct\* OR thrombo\* OR emboli\* OR occlus\* OR haemorrhage\* OR hemorrhage\* OR haematoma\* OR hematoma\* OR bleed\*)))

# S3 ((MH "Rehabilitation+") OR (MH "Physical and Rehabilitation Medicine+") OR (MH "Activities of Daily Living")) OR TI ((rehabilitation OR readaption OR readjust\* OR revalidat\* OR recover\* OR functional assessment\* OR neurorehabilitation OR neuro-rehabilitation OR

independen\*) OR ((walking OR motor) N3 function) OR ((functional OR motor) N3 (recover\* OR impair\*)) OR (daily N3 activit\*) ) OR AB ( (rehabilitation OR readaption OR readjust\* OR revalidat\* OR recover\* OR functional assessment\* OR neurorehabilitation OR neuro-rehabilitation OR independen\*) OR ((walking OR motor) N3 function) OR ((functional OR motor) N3 (recover\* OR impair\*)) OR (daily N3 activit\*) )

# S4 S1 AND S2 AND S3

# S5 S4 NOT (MH "Animals" NOT MH "Humans")

# S6 S5 AND LA (English OR German)
