# Supplementary material for: Effect of brain-computer interface training based on non-invasive electroencephalography using motor imagery on functional recovery after stroke - a systematic review and meta-analysis
Source: PubMed Central journal article supplement (PMC7584076; doi:10.1186/s12883-020-01960-5), 2020-10-22
Supplement: 12883_2020_1960_MOESM2_ESM.pdf [file 12883_2020_1960_MOESM2_ESM.pdf]

**Overview on extracted study data.**

|                                       |                                                                                                                                                                                                                                                                                                                                                                                   |
|---------------------------------------|-----------------------------------------------------------------------------------------------------------------------------------------------------------------------------------------------------------------------------------------------------------------------------------------------------------------------------------------------------------------------------------|
| Study-related data                    | <ol style="list-style-type: none"> <li>1. Author</li> <li>2. Title</li> <li>3. Year of publication</li> <li>4. Country of study</li> </ol>                                                                                                                                                                                                                                        |
| Population- and disease-related data  | <ol style="list-style-type: none"> <li>1. Diagnosis (ischemic, hemorrhagic stroke)</li> <li>2. Affected body side</li> <li>3. Affected brain location</li> <li>4. Severity of stroke</li> <li>5. Time after stroke</li> <li>6. Age (mean), gender</li> <li>7. Trial's inclusion and exclusion criteria</li> </ol>                                                                 |
| Methodological data                   | <ol style="list-style-type: none"> <li>1. Study design</li> <li>2. Randomization, by whom, how done, how concealed</li> <li>3. Blinding, who, what blinding checked</li> <li>4. Incomplete outcome reporting</li> <li>5. Proportion of patient drop-outs</li> <li>6. Followed the analysis of the intention-to-treat principle</li> <li>7. Selective outcome reporting</li> </ol> |
| Experimental group                    | <ol style="list-style-type: none"> <li>1. Sample size</li> <li>2. BCI screening</li> <li>3. Drop-outs</li> <li>4. Measurement sessions</li> </ol>                                                                                                                                                                                                                                 |
| BCI-training-related measures         | <ol style="list-style-type: none"> <li>1. BCI technology used</li> <li>2. Duration</li> <li>3. Frequency</li> <li>4. Total number of trainings</li> <li>5. Total number of training time</li> <li>6. Training content</li> <li>7. Training level recommendations and background for personnel</li> </ol>                                                                          |
| Comparison group                      | <ol style="list-style-type: none"> <li>1. Sample size</li> <li>2. Drop-outs</li> <li>3. Measurement sessions</li> </ol>                                                                                                                                                                                                                                                           |
| Comparison: training related measures | <ol style="list-style-type: none"> <li>1. Type or technique used</li> <li>2. Duration</li> <li>3. Frequency</li> <li>4. Total number of trainings</li> </ol>                                                                                                                                                                                                                      |

|          |                                                                                                                                                                                                                                                                                                                                                                                                                                                                                                                                                         |
|----------|---------------------------------------------------------------------------------------------------------------------------------------------------------------------------------------------------------------------------------------------------------------------------------------------------------------------------------------------------------------------------------------------------------------------------------------------------------------------------------------------------------------------------------------------------------|
|          | <ol style="list-style-type: none"><li>5. Total number of training time</li><li>6. Training content</li><li>7. Training level recommendations and background for personnel</li></ol>                                                                                                                                                                                                                                                                                                                                                                     |
| Outcomes | <ol style="list-style-type: none"><li>1. Pre- and post-assessment data (raw and/or data that report changes in the assessment from pre- to post-measurement session) regarding<ol style="list-style-type: none"><li>a. Upper limb function</li><li>b. Lower limb function</li><li>c. Walking ability</li><li>d. Balance</li><li>e. Activity of daily living</li><li>f. Any other functional or impairment-related assessment</li></ol></li><li>2. Raw or change in term of accuracy in percent</li><li>3. Raw or change scores in Brain Index</li></ol> |
